# Supplementary material for: Prognostic value of complementary biomarkers of neurodegeneration in a mixed memory clinic cohort
Source: PeerJ journal article supplement (doi:10.7717/peerj.9498), 2020-07-09
Supplement: Supplemental_Figure_S1.pdf [file Supplemental_Figure_S1.pdf]

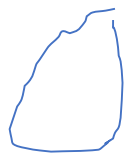

No MRI/FDG pathology

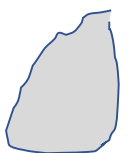

Isolated atrophy (MRI)

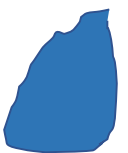

Isolated hypometabolism (FDG)

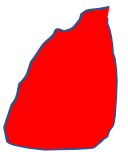

Hypometabolism (FDG) and atrophy (MRI)

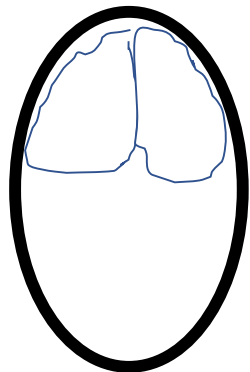

No abnormality

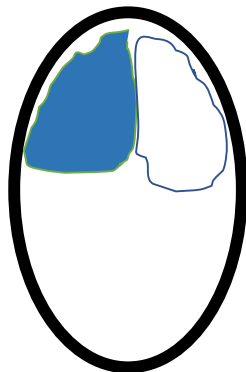

Isolated hypometabolism

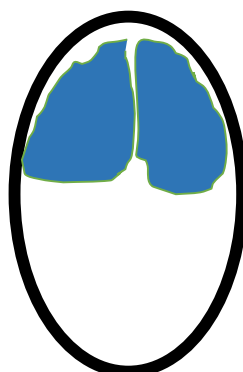

Isolated hypometabolism

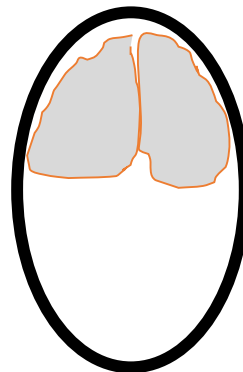

Isolated atrophy

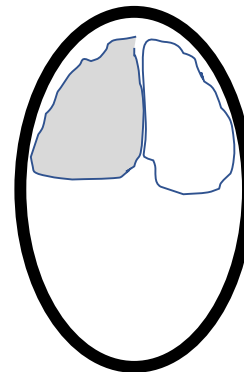

Isolated atrophy

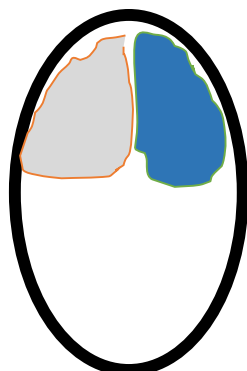

Any congruence and/or non-isolated atrophy/hypometabolism (CNIAH)

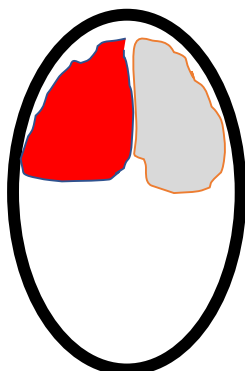

CNIAH

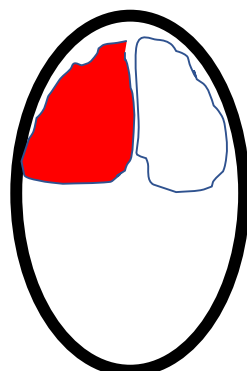

CNIAH

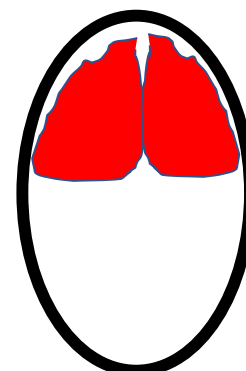

CNIAH

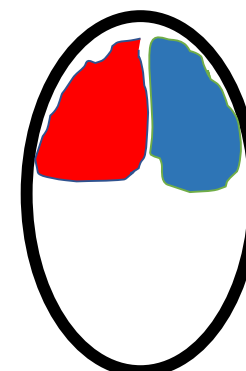

CNIAH
