# Supplementary material for: Prognostic value of complementary biomarkers of neurodegeneration in a mixed memory clinic cohort
Source: PeerJ journal article supplement (doi:10.7717/peerj.9498), 2020-07-09

Grey and white matter total FDG uptake vs. MMSE difference

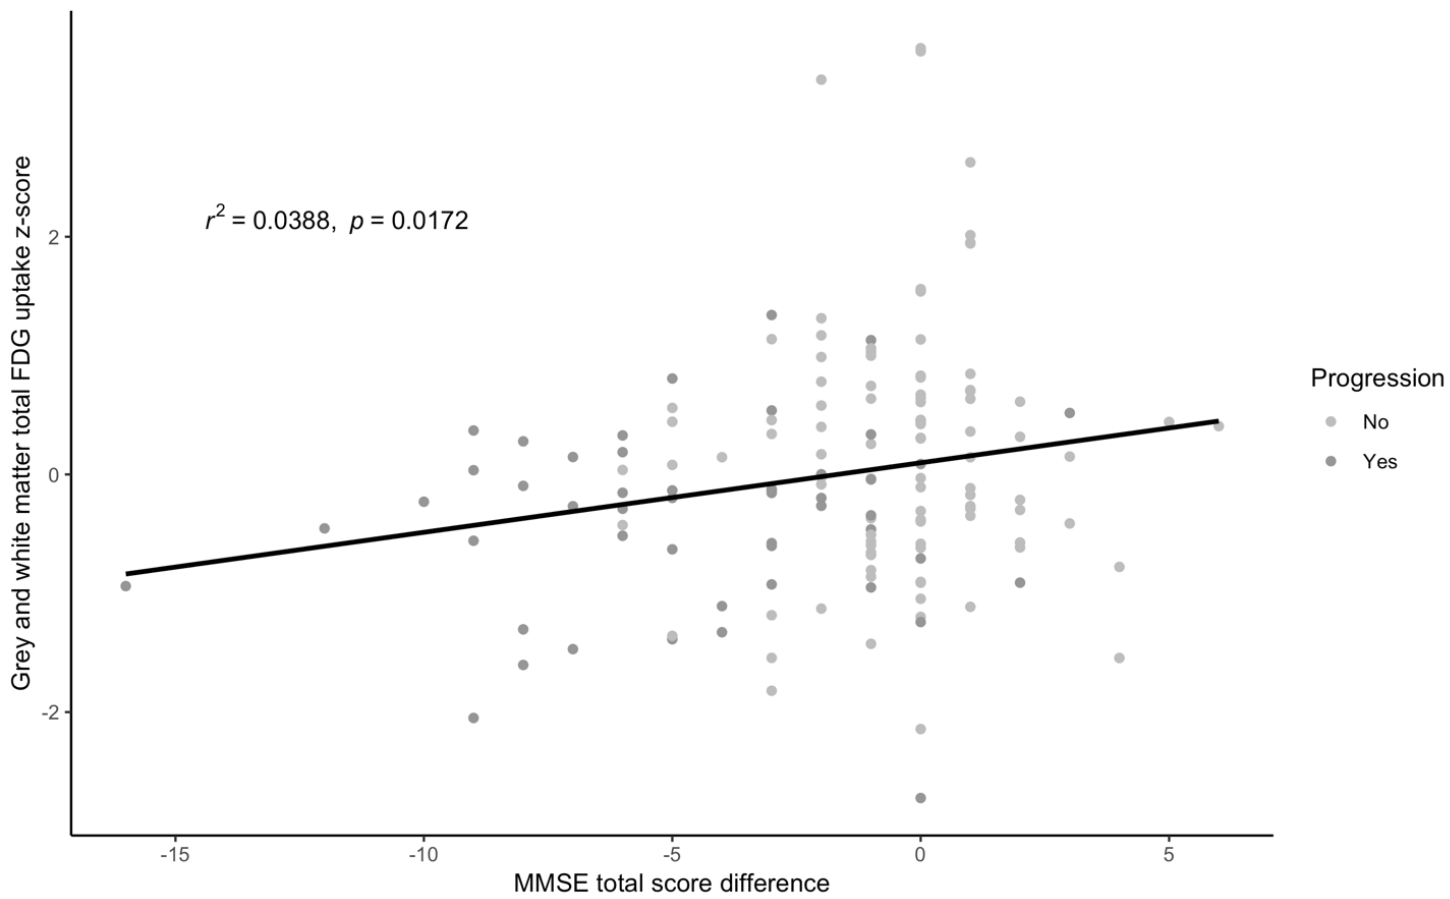

Supplement: Supplemental_Figure_S4.pdf [file Supplemental_Figure_S4.pdf]
